# Supplementary material for: Genomic characterization of the conditionally dispensable chromosome in Alternaria arborescens provides evidence for horizontal gene transfer
Source: PubMed Central journal article supplement (PMC3443068; doi:10.1186/1471-2164-13-171), 2012-05-06
Supplement: 1471-2164-13-171-S2.pdf [file 1471-2164-13-171-S2.pdf]

**Table S1. Velvet *de-novo* assembly statistics.** Results from assembly attempts using varying parameters. The red data shows the optimized assembly.

| <b>K</b>  | <b>Ins_length<br/>(bp)</b> | <b>Exp_cov</b> | <b>Cut-off</b> | <b>Min_lgth<br/>(bp)</b> | <b>N50<br/>(bp)</b> | <b>Max_lgth<br/>(bp)</b> | <b>Total size<br/>(Mb)</b> | <b>Reads<br/>used</b> |
|-----------|----------------------------|----------------|----------------|--------------------------|---------------------|--------------------------|----------------------------|-----------------------|
| <b>31</b> | 350                        | 42             | 5              | 100                      | 84390               | 485954                   | 33.9                       | 46910423              |
| <b>41</b> | 350                        | 33             | 5              | 100                      | 390559              | 1219988                  | 33.9                       | 46820556              |
| <b>51</b> | <b>350</b>                 | <b>24</b>      | <b>5</b>       | <b>100</b>               | <b>624394</b>       | <b>1544694</b>           | <b>34.0</b>                | <b>46047345</b>       |
| <b>57</b> | 350                        | 16             | 5              | 100                      | 441130              | 2135139                  | 34.0                       | 45564058              |

**Table S2. Repeat region identification.**

| <b>Chromosome</b> | <b>Total length (bp)</b> | <b>Repeat length (bp)</b> | <b>Repeat coverage</b> |
|-------------------|--------------------------|---------------------------|------------------------|
| <b>CDC</b>        | 906,671                  | 47,990                    | 5.29%                  |
| <b>ECs</b>        | 32,675,713               | 186,054                   | 0.57%                  |

**Table S3. Codon usage correlation analysis.** Numbers in red show lower correlation scores between CDC and EC contigs compared to correlation within EC groups or within CDC groups, indicating existence of codon usage bias of CDC genes.

|       | CDC_1    | CDC_2    | EC_1     | EC_2     | EC_3     | EC_4     | EC_5     | EC_6     | EC_7     | EC_8 |
|-------|----------|----------|----------|----------|----------|----------|----------|----------|----------|------|
| CDC_1 | 1        |          |          |          |          |          |          |          |          |      |
| CDC_2 | 0.99498  | 1        |          |          |          |          |          |          |          |      |
| EC_1  | 0.988367 | 0.991071 | 1        |          |          |          |          |          |          |      |
| EC_2  | 0.991584 | 0.994898 | 0.999034 | 1        |          |          |          |          |          |      |
| EC_3  | 0.991876 | 0.99391  | 0.99934  | 0.999358 | 1        |          |          |          |          |      |
| EC_4  | 0.988976 | 0.991239 | 0.999809 | 0.99915  | 0.999233 | 1        |          |          |          |      |
| EC_5  | 0.989628 | 0.991697 | 0.99981  | 0.99927  | 0.999503 | 0.999778 | 1        |          |          |      |
| EC_6  | 0.991425 | 0.995012 | 0.998789 | 0.999853 | 0.999158 | 0.998843 | 0.999091 | 1        |          |      |
| EC_7  | 0.991919 | 0.993676 | 0.999475 | 0.999374 | 0.999703 | 0.999484 | 0.999566 | 0.999152 | 1        |      |
| EC_8  | 0.991876 | 0.99391  | 0.99934  | 0.999358 | 1        | 0.999233 | 0.999503 | 0.999158 | 0.999703 | 1    |

**Table S4. Differences in codon usage between CDC and EC genes. Three amino acids showing the most bias.**

| <b>Codon</b> | <b>Amino Acid</b> | <b>Frequency in CDC</b> | <b>Frequency in EC</b> |
|--------------|-------------------|-------------------------|------------------------|
| AAA          | K                 | 35.0%                   | 29.6%                  |
| AAG          | K                 | 65.0%                   | 70.4%                  |
| AAT          | N                 | 36.8%                   | 32.3%                  |
| AAC          | N                 | 63.3%                   | 67.7%                  |
| TAT          | Y                 | 37.7%                   | 32.2%                  |
| TAC          | Y                 | 62.4%                   | 67.8%                  |

**Table S5. Ka/Ks ratio of CDC protein conserved domains.** The last column shows the enrichment of Ka/Ks domains as compared to the whole protein.

| domain_ID                        | Ka     | Ks     | domain Ka/Ks | protein_Ka/Ks | domain/protein-ratio |
|----------------------------------|--------|--------|--------------|---------------|----------------------|
| CDC_151_HAD_like                 | 67.10  | 28.90  | 0.74         | 0.06          | 12.33                |
| CDC_151_HMA                      | 51.70  | 17.30  | 0.13         | 0.06          | 2.10                 |
| CDC_84_GAL4                      | 22.00  | 2.00   | 0.21         | 0.11          | 1.91                 |
| CDC_151_E1-E2_ATPase             | 103.80 | 49.20  | 0.10         | 0.06          | 1.72                 |
| CDC_144_Pat17_PNPLA8_PNPLA9_like | 113.50 | 48.50  | 0.41         | 0.30          | 1.36                 |
| CDC_178_AbfB                     | 327.90 | 107.10 | 0.12         | 0.10          | 1.17                 |
| CDC_68_p450                      | 442.30 | 172.70 | 0.14         | 0.14          | 1.01                 |
| CDC_161_RTAl                     | 184.00 | 77.00  | 0.12         | 0.13          | 0.99                 |
| CDC_118_MOZ_SAS                  | 441.40 | 149.60 | 0.03         | 0.03          | 0.97                 |
| CDC_46_TA_like                   | 395.20 | 153.80 | 0.10         | 0.11          | 0.93                 |
| CDC_92_Aa_trans                  | 900.30 | 293.70 | 0.07         | 0.08          | 0.92                 |
| CDC_28_SDR_c                     | 533.30 | 216.70 | 0.03         | 0.03          | 0.90                 |
| CDC_66_P21-Arc                   | 438.40 | 128.60 | 0.03         | 0.04          | 0.84                 |
| CDC_183_Syja_N                   | 916.00 | 146.00 | 0.02         | 0.02          | 0.84                 |
| CDC_169_Rubis-subs-bind          | 106.90 | 34.10  | 0.09         | 0.12          | 0.74                 |
| CDC_161_Peptidases_S8_S53        | 256.10 | 106.90 | 0.09         | 0.13          | 0.71                 |
| CDC_102_CAP59_mtransfer          | 163.00 | 53.00  | 0.34         | 0.51          | 0.66                 |
| CDC_188_Peptidases_S53           | 957.50 | 212.50 | 0.03         | 0.05          | 0.64                 |
| CDC_178_ArabFuran-catal          | 629.00 | 238.00 | 0.06         | 0.10          | 0.60                 |
| CDC_67_Rep_fac_C                 | 196.40 | 70.60  | 0.02         | 0.03          | 0.58                 |
| CDC_184_Rab5_related             | 240.70 | 56.30  | 0.01         | 0.03          | 0.52                 |
| CDC_146APH                       | 72.30  | 29.70  | 0.20         | 0.45          | 0.45                 |
| CDC_107_PLN02844                 | 469.90 | 133.10 | 0.06         | 0.14          | 0.44                 |
| CDC_161_PA_PoS1_like             | 245.50 | 114.50 | 0.05         | 0.13          | 0.42                 |
| CDC_161_Peptidases_S8_5          | 405.40 | 176.60 | 0.05         | 0.13          | 0.38                 |
| CDC_161_DUF1034                  | 237.50 | 95.50  | 0.05         | 0.13          | 0.37                 |
| CDC_51_ACC_central               | 210.10 | 68.90  | 0.01         | 0.02          | 0.34                 |
| CDC_67_AAA                       | 336.40 | 116.60 | 0.01         | 0.03          | 0.17                 |
| CDC_189_Na_Ca_ex                 | 277.80 | 88.20  | 0.00         | 0.02          | 0.17                 |

**Table S6. Conserved domains in CDC putative PKS genes.**

| Query   | From | To   | Bitscore | Accession  | Short name                    |
|---------|------|------|----------|------------|-------------------------------|
| CDC_4   | 2    | 295  | 212.038  | cl02872    | DHQ_Fe-ADH superfamily        |
| CDC_6   | 41   | 299  | 123.824  | cl10444    | Ras_like_GTPase superfamily   |
| CDC_23  | 23   | 257  | 189.418  | cd05233    | SDR_c                         |
| CDC_23  | 23   | 257  | 189.418  | cl09931    | NADB_Rossmann superfamily     |
| CDC_23  | 3    | 259  | 208.475  | PRK05653   | fabG                          |
| CDC_28  | 50   | 299  | 211.374  | cd05233    | SDR_c                         |
| CDC_28  | 50   | 299  | 211.374  | cl09931    | NADB_Rossmann superfamily     |
| CDC_28  | 43   | 303  | 220.031  | PRK05653   | fabG                          |
| CDC_36  | 154  | 381  | 314.006  | cd03249    | ABC_MTABC3_MDL1_MDL2          |
| CDC_36  | 154  | 381  | 314.006  | cl09099    | P-loop NTPase superfamily     |
| CDC_36  | 695  | 934  | 313.621  | cd03249    | ABC_MTABC3_MDL1_MDL2          |
| CDC_36  | 695  | 934  | 313.621  | cl09099    | P-loop NTPase superfamily     |
| CDC_36  | 695  | 923  | 142.167  | COG1126    | GlnQ                          |
| CDC_36  | 154  | 370  | 141.397  | COG1126    | GlnQ                          |
| CDC_37  | 67   | 496  | 169.38   | cl12078    | p450 superfamily              |
| CDC_41  | 457  | 662  | 196.457  | cl09099    | P-loop NTPase superfamily     |
| CDC_41  | 150  | 688  | 161.391  | COG1132    | MdIB                          |
| CDC_42  | 694  | 1102 | 421.667  | cd06206    | bifunctional_CYPOR            |
| CDC_42  | 694  | 1102 | 421.667  | cl06868    | FNR_like superfamily          |
| CDC_42  | 26   | 439  | 227.546  | cl12078    | p450 superfamily              |
| CDC_42  | 466  | 1102 | 260.325  | COG0369    | CysJ                          |
| CDC_49  | 180  | 552  | 285.031  | cl00285    | Aconitase superfamily         |
| CDC_80  | 1022 | 1205 | 116.368  | cl00160    | LbetaH superfamily            |
| CDC_141 | 33   | 454  | 533.223  | cd00833    | PKS                           |
| CDC_141 | 33   | 454  | 533.223  | cl09938    | cond_enzymes superfamily      |
| CDC_141 | 1237 | 1608 | 202.13   | cd08955    | KR_2_FAS_SDR_x                |
| CDC_141 | 1237 | 1608 | 202.13   | cl09931    | NADB_Rossmann superfamily     |
| CDC_141 | 564  | 879  | 270.822  | cl08282    | Acyl_transf_1 superfamily     |
| CDC_141 | 34   | 457  | 623.228  | smart00825 | PKS_KS                        |
| CDC_144 | 271  | 596  | 127.448  | cd07199    | Pat17_PNPLA8_PNPLA9_like      |
| CDC_144 | 271  | 596  | 127.448  | cl11396    | Patatin_and_cPLA2 superfamily |
| CDC_147 | 172  | 365  | 121.98   | cl14604    | Methyltransf_2 superfamily    |
| CDC_165 | 30   | 447  | 519.356  | cd00833    | PKS                           |
| CDC_165 | 30   | 447  | 519.356  | cl09938    | cond_enzymes superfamily      |
| CDC_165 | 1909 | 2144 | 276.372  | cd05195    | enoyl_red                     |
| CDC_165 | 1909 | 2144 | 276.372  | cl14614    | MDR superfamily               |
| CDC_165 | 2158 | 2381 | 171.314  | cd08955    | KR_2_FAS_SDR_x                |
| CDC_165 | 2158 | 2381 | 171.314  | cl09931    | NADB_Rossmann superfamily     |
| CDC_165 | 640  | 940  | 283.123  | cl08282    | Acyl_transf_1 superfamily     |
| CDC_165 | 1005 | 1179 | 110.38   | cl11739    | PKS_DH superfamily            |
| CDC_165 | 32   | 449  | 595.108  | smart00825 | PKS_KS                        |
| CDC_165 | 1913 | 2144 | 293.921  | smart00829 | PKS_ER                        |
| CDC_183 | 57   | 410  | 355.778  | cl11995    | Syja_N superfamily            |

**Table S7. Primers used for Southern hybridization.**

| <b>Probe</b>         | <b>Primer_F</b>      | <b>Primer_R</b>      |
|----------------------|----------------------|----------------------|
| <b>ALT1</b>          | TGCAGTCGAGCTGTCACTT  | GCGATCAGAGATGACGAACA |
| <b>CDC_92</b>        | CGTCCGTTATCCTGGTCACT | GAATCGCAGATGCAATGATG |
| <b>CDC_102</b>       | CCTCCGCAGCTCTACGATAC | CCTATGCCGTTCCAACAAC  |
| <b>CDC_147</b>       | ATGATTCGGCAAATCTCTGG | CTTGAGGTAGGCAGGCAAAG |
| <b>EC_97_90_g721</b> | GCCTATCTGCACCGCTCTAC | GATGGCGACTGCTAGACCTC |
